# Supplementary material
Source: PubMed Central journal article supplement (PMC3101082)
Supplement: supp_data.pdf [file supp_data.pdf]

## Supplementary Data

SUPPLEMENTARY TABLE S1. ADJUSTED PAIRWISE CORRELATION AMONG THREE PLASMA ANALYTES AND TWO HIV-1-RELATED OUTCOMES IN 60 YOUTH<sup>a</sup>

| <i>Parameter</i>        | <i>IL-10</i>           | <i>IL-18</i>    | <i>Soluble CD30</i> | <i>HIV-1 viral load</i> | <i>CD4<sup>+</sup> T cell</i> |
|-------------------------|------------------------|-----------------|---------------------|-------------------------|-------------------------------|
| IL-10                   | 0.765 (<0.0001)        | 0.284 (0.026)   | 0.348 (0.009)       | 0.381 (0.004)           | -0.339 (0.011)                |
| IL-18                   | 0.422 (0.002)          | 0.768 (<0.0001) | 0.171 (0.212)       | 0.269 (0.047)           | -0.322 (0.017)                |
| Soluble CD30            | 0.374 (0.006)          | 0.293 (0.033)   | 0.829 (<0.0001)     | <b>0.483</b> (<0.001)   | -0.330 (0.014)                |
| HIV-1 viral load        | <b>0.523</b> (<0.0001) | 0.371 (0.006)   | 0.519 (<0.0001)     | 0.823 (<0.0001)         | -0.710 (<0.0001)              |
| CD4 <sup>+</sup> T cell | -0.597 (<0.0001)       | -0.381 (0.005)  | -0.482 (<0.001)     | -0.790 (<0.0001)        | 0.890 (<0.0001)               |

<sup>a</sup>Similar to results presented in Table 2, each individual is analyzed for two treatment-free visits within the first 3 years of longitudinal follow-up study. Results (Spearman  $\rho$  and  $p$  value in parentheses) from visit 1 are over the diagonal, after statistical adjustment for race, sex, age, and BMI; adjusted results from visit 2 are below the diagonal; tests between visit 1 and visit 2 are in italics on the diagonal, with further adjustment for the visit interval. The best predictor of HIV-1 viral load within each visit is shown in bold.

SUPPLEMENTARY TABLE S2. PAIRWISE CORRELATION AMONG THREE PLASMA ANALYTES AND TWO HIV-1-RELATED OUTCOMES IN 48 AIDS-FREE YOUTH<sup>a</sup>

|                         | <i>IL-10</i>    | <i>IL-18</i>    | <i>Soluble CD30</i>    | <i>HIV-1 viral load</i> | <i>CD4<sup>+</sup> T cell</i> |
|-------------------------|-----------------|-----------------|------------------------|-------------------------|-------------------------------|
| IL-10                   | 0.729 (<0.0001) | 0.304 (0.036)   | 0.570 (<0.0001)        | 0.436 (0.002)           | -0.480 (<0.001)               |
| IL-18                   | 0.277 (0.056)   | 0.720 (<0.0001) | 0.374 (0.008)          | 0.356 (0.013)           | -0.380 (0.008)                |
| Soluble CD30            | 0.483 (<0.001)  | 0.333 (0.021)   | 0.856 (<0.0001)        | <b>0.762</b> (<0.0001)  | -0.707 (<0.0001)              |
| HIV-1 viral load        | 0.390 (0.006)   | 0.314 (0.030)   | <b>0.739</b> (<0.0001) | 0.833 (<0.0001)         | -0.751 (<0.0001)              |
| CD4 <sup>+</sup> T cell | -0.334 (0.020)  | -0.336 (0.019)  | -0.576 (<0.0001)       | -0.748 (<0.0001)        | 0.871 (<0.0001)               |

<sup>a</sup>As in Table 2, each individual is analyzed for two treatment-free visits within the first 3 years of longitudinal follow-up study. Those ( $n = 18$ ) with severe immunodeficiency (less than 200 CD4<sup>+</sup> T cells per  $\mu$ l of blood) at any visit are excluded. Results (Spearman  $\rho$  and  $p$  value in parentheses) from visit 1 are over the diagonal; results from visit 2 are below the diagonal; comparison between visit 1 and visit 2 are in italics on the diagonal. The best predictor of HIV-1 viral load within each visit is shown in bold.
